# Supplementary material
Source: HighWire-hosted journal article supplement (https://bmjopen.bmj.com/content/7/10/e017729)
Supplement: inline-supplementary-material-1 [file inline-supplementary-material-1.pdf]

## Supplementary material

**Table S1. List of used medical codes for prostate cancer biopsies and diagnoses**

| Biopsies |                                                                         | Diagnoses |                                                           |
|----------|-------------------------------------------------------------------------|-----------|-----------------------------------------------------------|
| Medcode  | Readterm                                                                | Medcode   | Readterm                                                  |
| 1069     | <i>Transrectal needle biopsy of prostate</i>                            | 780       | <i>Malignant neoplasm of prostate</i>                     |
| 7908     | <i>Open biopsy of prostate</i>                                          | 6328      | <i>Carcinoma in situ of prostate</i>                      |
| 7909     | <i>Unspec diagnostic cystoscopic exam bladder &amp; biopsy prostate</i> | 10178     | <i>Gleason grading of prostate</i>                        |
| 12391    | <i>Transurethral biopsy prostate</i>                                    | 18503     | <i>Gleason prostate grade 2-4 (low)</i>                   |
| 22297    | <i>Trucut transperineal biopsy of prostate</i>                          | 18612     | <i>Gleason prostate grade 5-7 (medium)</i>                |
| 22473    | <i>Transperineal needle biopsy of prostate</i>                          | 26081     | <i>Gleason prostate grade 8-10 (high)</i>                 |
| 22719    | <i>Endoscopic punch biopsy of prostate</i>                              | 37306     | <i>Personal history of malignant neoplasm of prostate</i> |
|          |                                                                         | 102314    | <i>History of prostate cancer</i>                         |

**Table S2. The percentage of men diagnosed with prostate cancer in CPRD based on their first and second PSA test**

| % diagnosed (n/N)                 | Second test (within 1 year) PSA level <sup>~</sup> |                  |                  |                   |                   |
|-----------------------------------|----------------------------------------------------|------------------|------------------|-------------------|-------------------|
|                                   | No 2nd test                                        | PSA<3            | 3≤PSA<6          | 6≤PSA<10          | PSA≥10            |
| First test PSA level <sup>~</sup> |                                                    |                  |                  |                   |                   |
| PSA<3                             | <1%<br>(106/59883)                                 | <1%<br>(33/7315) | 1%<br>(4/413)    | 10%<br>(7/70)     | 15%<br>(7/46)     |
| 3≤PSA<6                           | 3%<br>(234/8133)                                   | 1%<br>(6/748)    | 5%<br>(162/3027) | 14%<br>(66/483)   | 15%<br>(8/54)     |
| 6≤PSA<10                          | 24%<br>(452/1845)                                  | 1%<br>(3/230)    | 4%<br>(23/622)   | 17%<br>(269/1556) | 18%<br>(45/249)   |
| PSA≥10                            | 61%<br>(1232/2030)                                 | 6%<br>(11/183)   | 3%<br>(6/227)    | 9%<br>(29/338)    | 43%<br>(552/1281) |

<sup>~</sup>Men with PSA tests without a level recorded are not included
